# Supplementary material
Source: PubMed Central journal article supplement (PMC4136698)
Supplement: cb500371g_si_001.pdf [file cb500371g_si_001.pdf]

Divergent Modulation of Src-Family Kinase  
Regulatory Interactions with ATP-Competitive  
Inhibitors

Supporting Information

Stephen E. Leonard, Amy C. Register, Ratika Krishnamurty, Gabriel J. Brighty, and  
Dustin J. Maly

Affiliations: Department of Chemistry, University of Washington, Seattle, WA 98195, USA

Contact: [maly@chem.washington.edu](mailto:maly@chem.washington.edu)

### Src SH3 Pulldown

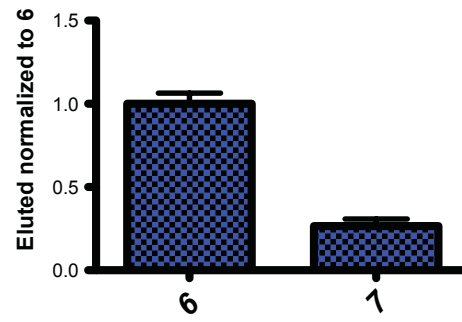

Figure S1. Quantification of the pull-down experiments performed with Src<sup>S245C</sup> in the presence of **6** or **7**. (mean +/- SEM, n=3).

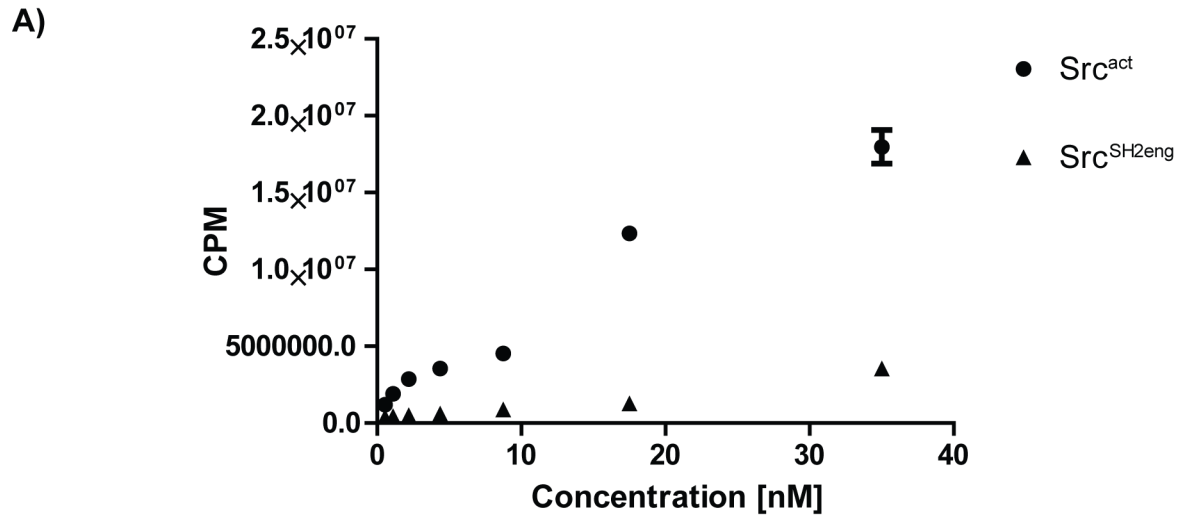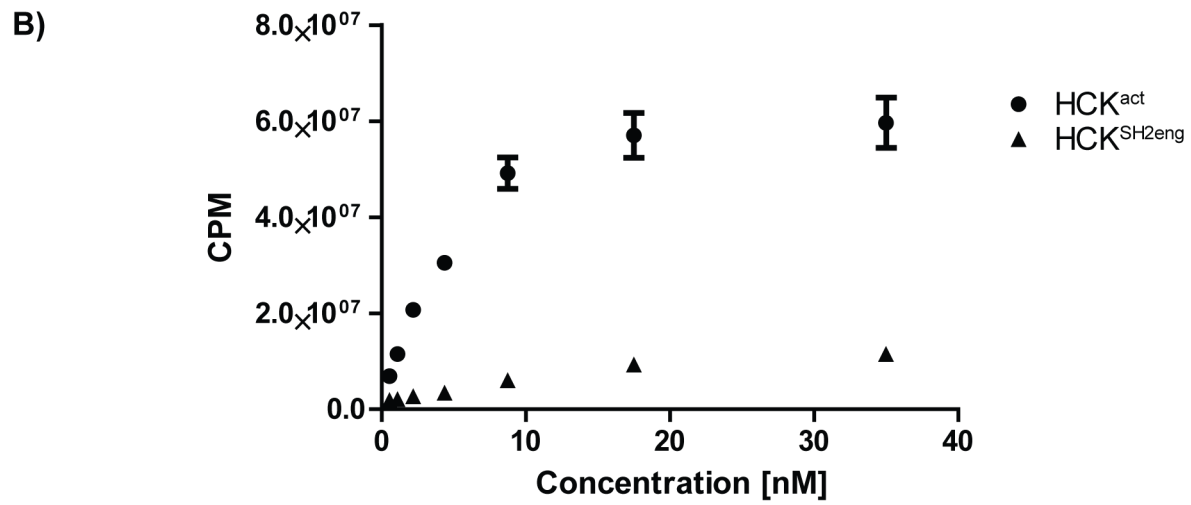

Figure S2. Catalytic activity of SFK constructs. A) Activity assay with Src<sup>act</sup>, Src<sup>Y527F</sup> or Src<sup>SH2eng</sup>. B) Activity assay with Hck<sup>act</sup>, Hck<sup>Y527F</sup> or Hck<sup>SH2eng</sup>.

Table S1.  $K_i$  values (nM) for drug resistant constructs.

|          | <b>Csk<sup>DR</sup></b> | <b>Src<sup>Y527F</sup></b> | <b>Hck<sup>Y527F</sup></b> |
|----------|-------------------------|----------------------------|----------------------------|
| <b>1</b> | >10000                  | 80                         | 164                        |
| <b>2</b> | 1420                    | 23                         | 6.6                        |
| <b>3</b> | 848                     | 5200                       | 1336                       |
| <b>4</b> | nt                      | <6                         | <6                         |
| <b>5</b> | 498                     | <6                         | <6                         |

Table S2. pY527 chemical genetic assay parameters.

| <b>Inhibitor</b>               | <b>1</b> | <b>2</b> | <b>5</b> |
|--------------------------------|----------|----------|----------|
| <b>%Src bound</b>              | 92       | 85       | 97       |
| <b>%Hck bound</b>              | 86       | 98       | 97       |
| <b>%Csk<sup>DR</sup> bound</b> | 9        | 9        | 10       |
| <b>[Inhibitor] nM</b>          | 1000     | 150      | 55       |

Table S3.  $K_i$  values (nM) for covalent inhibitors.

|          | <b>Src<sup>Y527F</sup></b> | <b>Src<sup>S245C</sup></b> | <b>Hck<sup>Y527F</sup></b> | <b>Hck<sup>S245C</sup></b> |
|----------|----------------------------|----------------------------|----------------------------|----------------------------|
| <b>6</b> | 350                        | <6                         | 648.1                      | <6                         |
| <b>7</b> | >10000                     | <6                         | 603                        | <6                         |

Table S4. Activity of SFK treated with covalent inhibitors for pY527 Assay.

| <b>Inhibitor</b>      | <b>Untreated</b> | <b>6</b> | <b>7</b> |
|-----------------------|------------------|----------|----------|
| <b>Src % Activity</b> | 100              | 0        | 0        |
| <b>Hck % Activity</b> | 100              | 0        | 0        |

Table S5.  $K_i$  values (nM) for SFKs.

|           | <b>Src</b> <sup>SH2eng</sup> | <b>Src</b> <sup>Act</sup> | <b>Hck</b> <sup>SH2eng</sup> | <b>Hck</b> <sup>Act</sup> |
|-----------|------------------------------|---------------------------|------------------------------|---------------------------|
| <b>1</b>  | 81                           | 43                        | 67                           | 31                        |
| <b>2</b>  | <20                          | 110                       | 17                           | 83                        |
| <b>3</b>  | 44                           | 1400                      | <10                          | 83                        |
| <b>4</b>  | <20                          | <0.5                      | <10                          | <0.5                      |
| <b>5</b>  | <20                          | <0.5                      | <10                          | <0.5                      |
| <b>8</b>  | 187                          | 1200                      | 60                           | 1100                      |
| <b>9</b>  | 1280                         | 66                        | 86                           | 12                        |
| <b>10</b> | 164                          | 33                        | 85                           | 7                         |
| <b>11</b> | 420                          | 18                        | 329                          | 14                        |
| <b>12</b> | 250                          | 39                        | 33                           | 0.7                       |
